# Supplementary material for: Functional Differences between Mitochondrial Haplogroup T and Haplogroup H in HEK293 Cybrid Cells
Source: PLOS journal article supplement (doi:10.1371/journal.pone.0052367), 2012-12-26
Supplement: S2 (10.1371/journal.pone.0052367.s002) [file journal.pone.0052367.s002]

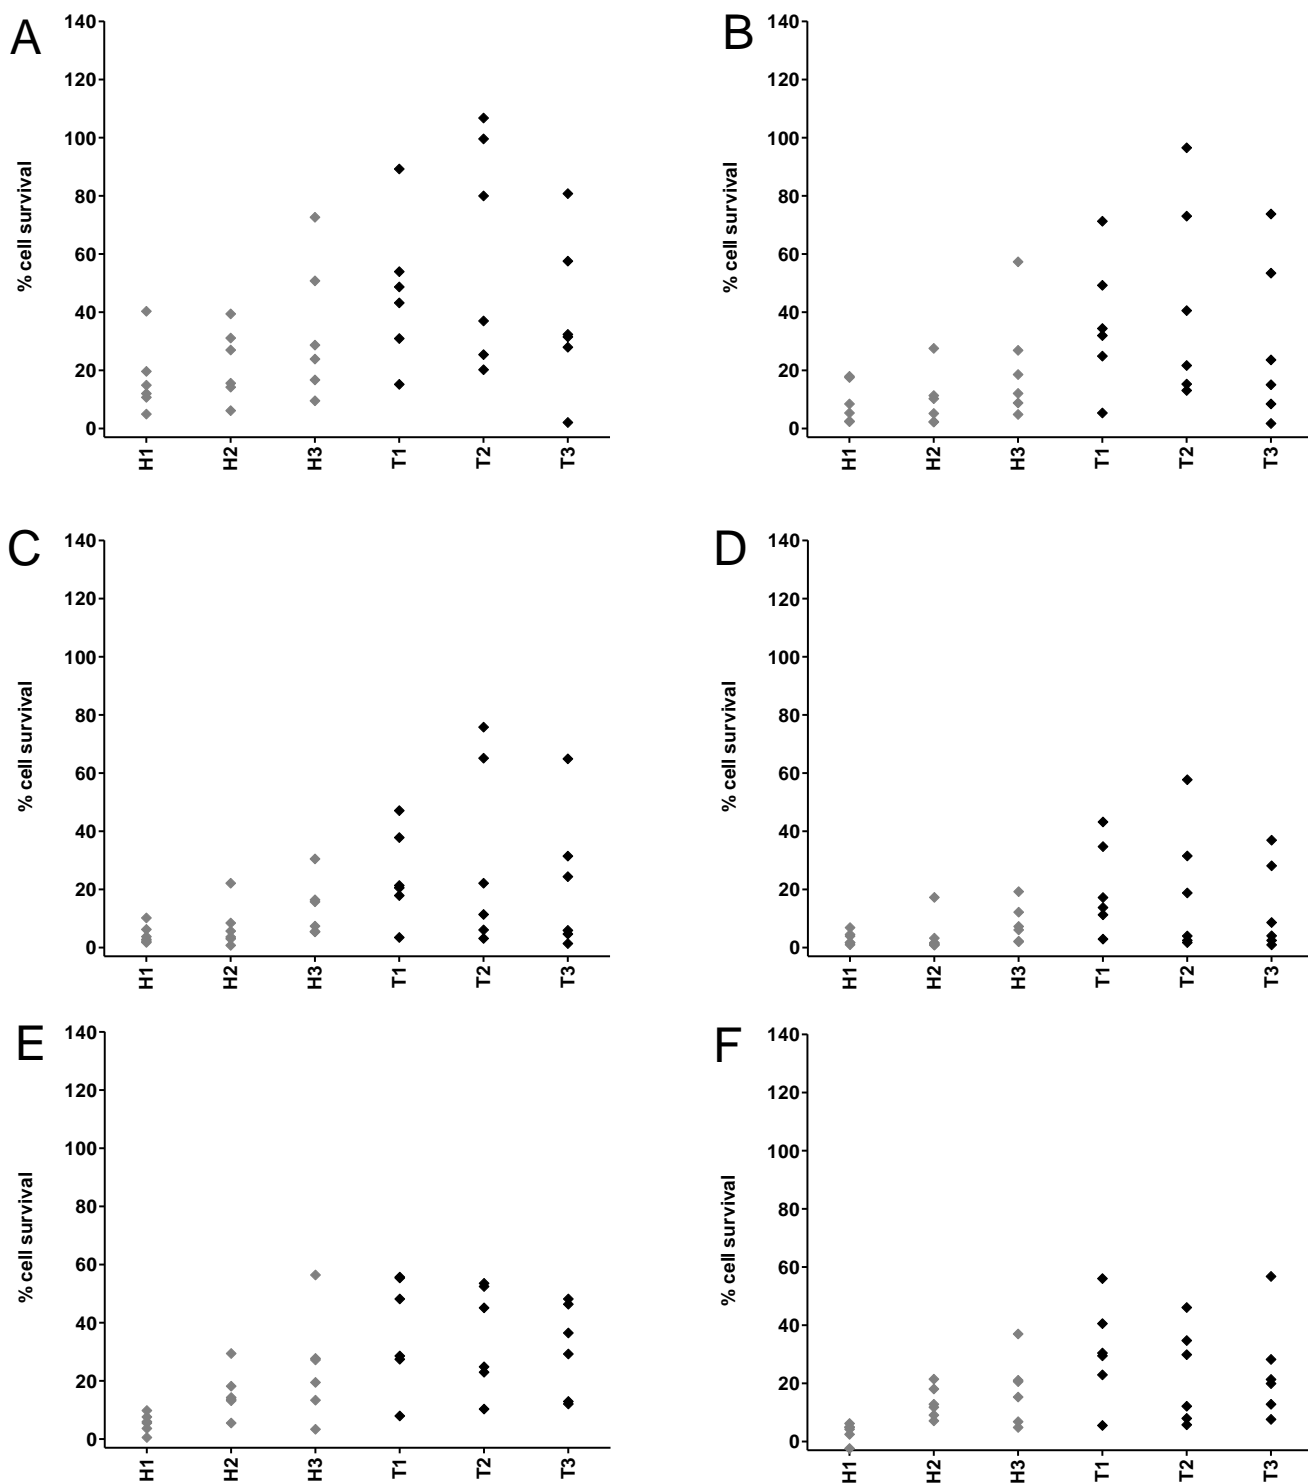

**Supplementary Fig S2.** Cell survival of single cybrids after treatment with hydrogen peroxide.

Cell survival of haplogroup H (gray rectangles) and haplogroup T (black rectangles) cybrids was measured 24 hours after  $H_2O_2$  treatment and calculated as percentage to cells without treatment (% cell survival). (A) Cell survival in glucose medium without serum and without sodium pyruvate and treated with  $250 \mu M H_2O_2$ . (B) Cell survival in glucose medium without serum and without sodium pyruvate and treated with  $325 \mu M H_2O_2$ . (C) Cell survival in glucose medium without serum and without sodium pyruvate and treated with  $400 \mu M H_2O_2$ . (D) Cell survival in glucose medium without serum and without sodium pyruvate and treated with  $475 \mu M H_2O_2$ . (E) Cell survival in galactose medium without serum and without sodium pyruvate and treated with  $200 \mu M H_2O_2$ . (F) Cell survival in galactose medium without serum and without sodium pyruvate and treated with  $250 \mu M H_2O_2$ .
